# Supplementary material
Source: publisher figshare collection journal article supplement (https://acs.figshare.com/ndownloader/files/11609090)
Supplement: Supplementary file 1 [file 11609090]

# Theory of Semiflexible Diblock Copolymer and Random Copolymers in Solvents: Supplemental Materials

Shifan Mao,<sup>†</sup> Quinn MacPherson,<sup>‡</sup> Chunzi Liu,<sup>†</sup> and Andrew J.

Spakowitz<sup>\*,†,¶,§,||,⊥</sup>

*<sup>†</sup>Department of Chemical Engineering, Stanford University, Stanford, CA, 94305*

*<sup>‡</sup>Department of Physics, Stanford University, Stanford, CA, 94305*

*<sup>¶</sup>Department of Applied Physics, Stanford University, Stanford, CA, 94305*

*<sup>§</sup>Department of Materials Science and Engineering, Stanford University, Stanford, CA, 94305*

*<sup>||</sup>Biophysics Program, Stanford University, Stanford, CA, 94305*

*<sup>⊥</sup>Stanford Institute for Materials and Energy Sciences, SLAC National Accelerator Laboratory, 2575 Sand Hill Road, Menlo Park, CA 94025*

E-mail: [ajspakow@stanford.edu](mailto:ajspakow@stanford.edu)

# Structure factors of diblock copolymer solutions

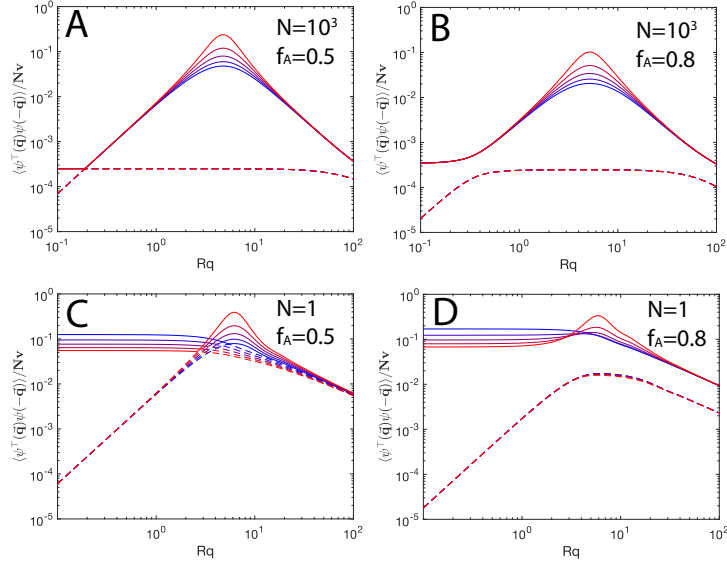

Figure 1: Dominant density correlations  $\langle \mathbf{v}_1 \cdot \mathbf{v}_1 \rangle$  and sub-dominant density correlations  $\langle \mathbf{v}_2 \cdot \mathbf{v}_2 \rangle$  of symmetric diblock copolymer solutions with  $N = 1000$  (A) and  $N = 1$  (C), and asymmetric diblock copolymer solutions with  $f_A = 0.8$ , and  $N = 1000$  (B) and  $N = 1$  (D). In all figures, total polymer concentration is  $\bar{\phi}_P = 0.50$ . Colors indicate increasing Flory Huggins parameter  $\chi/\chi_{AB}^* = 0.0, 0.2, 0.4, 0.6, 0.8$  from blue to red.

# Structure factors of random copolymer solutions

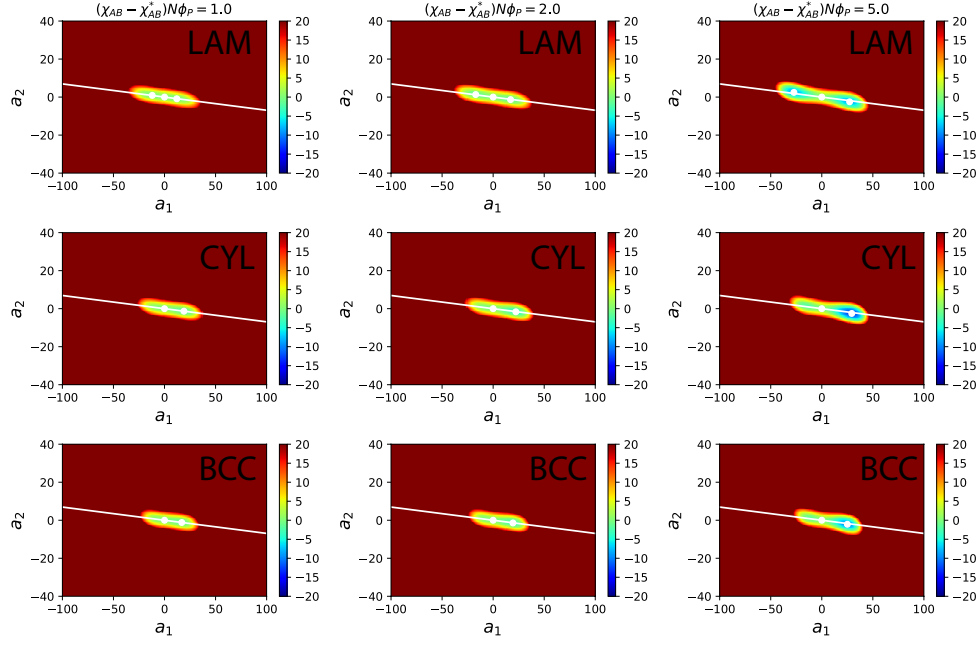

Figure 2: Dominant density correlations  $\langle \mathbf{v}_1 \cdot \mathbf{v}_1 \rangle$  and sub-dominant density correlations  $\langle \mathbf{v}_2 \cdot \mathbf{v}_2 \rangle$  of anticorrelated random copolymer solutions with  $\lambda = -0.75$ ,  $N_m = 100$  (A) and  $N_m = 0.01$  (C), and ideal random copolymer solutions with  $N_m = 100$  (B) and  $N_m = 0.01$  (D). Colors indicate increasing Flory Huggins parameter  $\chi/\chi_{AB}^* = 0.0, 0.2, 0.4, 0.6, 0.8$  from blue to red.

# Free energies of diblock copolymer solutions

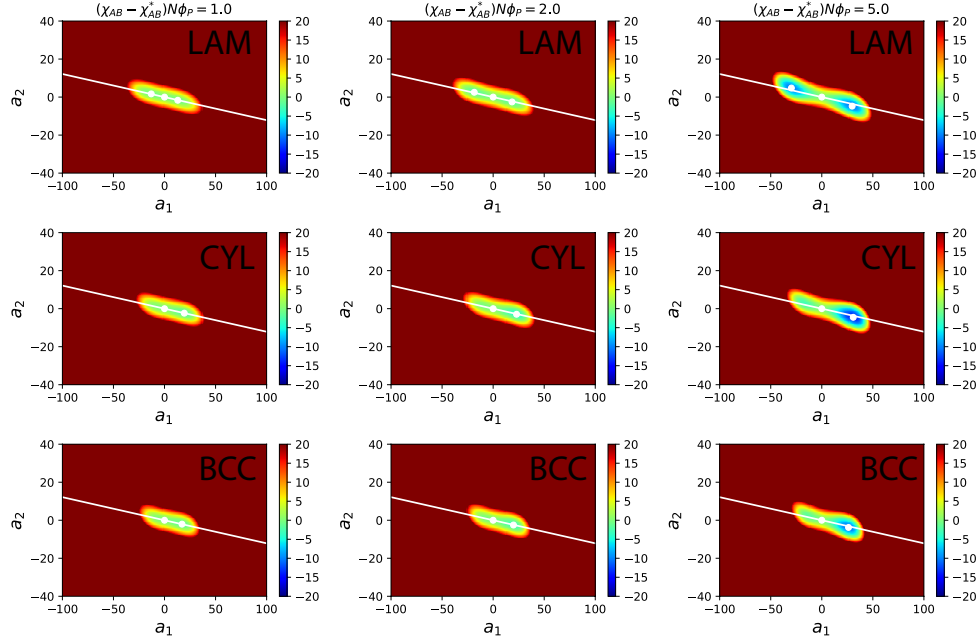

Figure 3: Free energy surfaces of lamellar (LAM), cylindrical (CYL), and body-centered-cubic (BCC) phases of diblock copolymer solutions with polymer length  $N=100$ , and Flory-Huggins parameter above the spinodal  $(\chi_{AB} - \chi_{AB}^*)N\phi_P = 1.0, 2.0$ , and  $5.0$ .

## References

- [1] Jiang, Y.; Chen, J. Z. Influence of Chain Rigidity on the Phase Behavior of Wormlike Diblock Copolymers. *Physical review letters* **2013**, *110*, 138305.



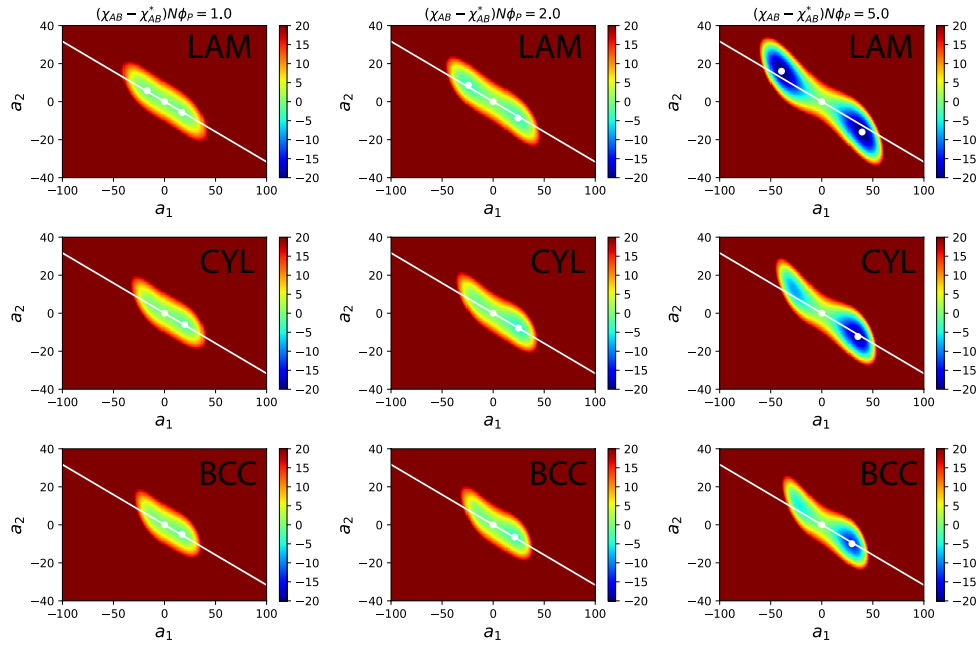

Figure 4: Free energy surfaces of lamellar (LAM), cylindrical (CYL), and body-centered-cubic (BCC) phases of diblock copolymer solutions with polymer length  $N=50$ , and Flory-Huggins parameter above the spinodal  $(\chi_{AB} - \chi_{AB}^*)N\phi_P = 1.0, 2.0$ , and  $5.0$ .

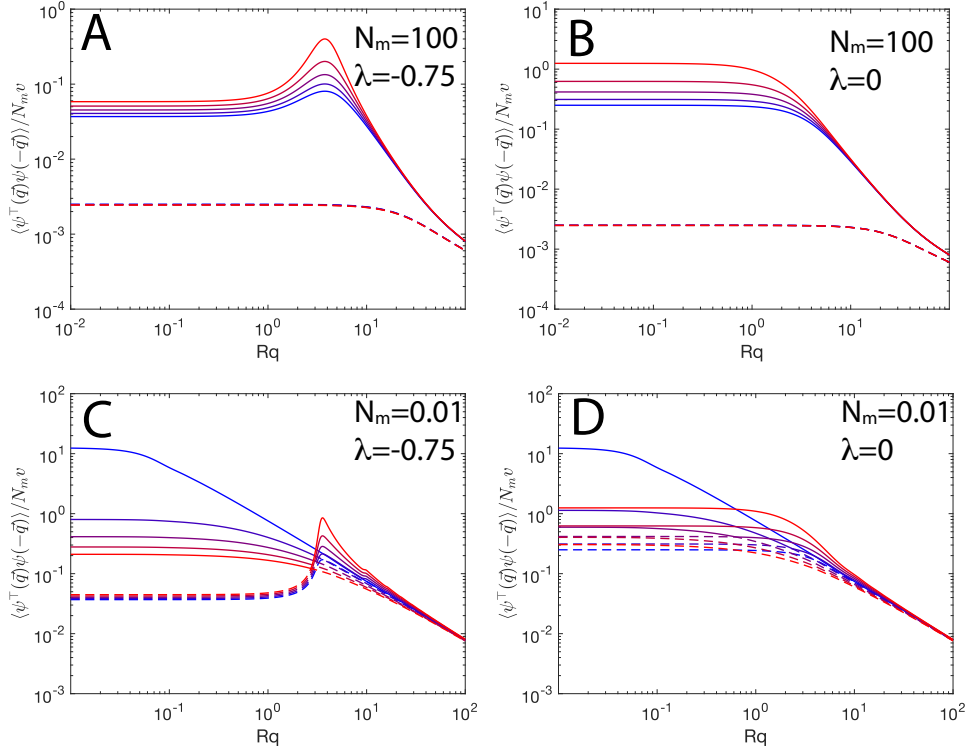

Figure 5: Free energy surfaces of lamellar (LAM), cylindrical (CYL), and body-centered-cubic (BCC) phases of diblock copolymer solutions with polymer length  $N=10$ , and Flory-Huggins parameter above the spinodal  $(\chi_{AB} - \chi_{AB}^*)N\bar{\phi}_P = 1.0, 2.0, \text{ and } 5.0$ .

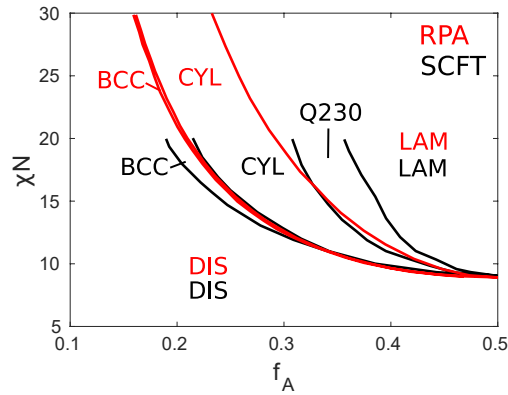

Figure 6: Here we compare the  $\chi N$  versus  $f$  phase diagram in the  $\bar{\phi}_P \rightarrow 1$  limit (red) with that obtained by Jiang and Chen using self-consistent field theory (black)<sup>1</sup> We did not consider the Q230 phase, which Jiang and Chen show falling between the CYL and LAM phases.
